# 1 Endogenous miRNA sponges mediate 2 the generation of oscillatory 3 dynamics for a non-coding RNA 4 network

5 Andrew Dhawan<sup>1</sup>, Adrian L. Harris<sup>1</sup>, Francesca M. Buffa<sup>1</sup>, Jacob G. Scott<sup>2</sup>

\*For correspondence:  
[scottj10@ccf.org](mailto:scottj10@ccf.org) (JGS);  
[adhawan@qmed.ca](mailto:adhawan@qmed.ca) (AD)

6 <sup>1</sup>Department of Oncology, University of Oxford, Oxford, United Kingdom; <sup>2</sup>Departments  
7 of Translational Hematology and Oncology Research, Cleveland Clinic, Cleveland, United  
8 States

9 **Oscillations are crucial to the sustenance of living organisms, across a wide variety of**  
10 **biological processes. In eukaryotes, oscillatory dynamics are thought to arise from inter-**  
11 **actions at the protein and RNA levels; however, the role of non-coding RNA in regulating**  
12 **these dynamics remains understudied. In this work, using a mathematical model, we show**  
13 **how non-coding RNA acting as miRNA sponges in a conserved miRNA - transcription factor**  
14 **feedback motif, can give rise to oscillatory behaviour. Control of these non-coding RNA can**  
15 **dynamically create oscillations or stability, and we show how this behaviour predisposes**  
16 **to oscillations in the stochastic limit. These results point towards novel hypotheses for the**  
17 **roles of different species of miRNA sponges, and help to provide a paradigm for functional**  
18 **differences between the many distinct RNA species thought to act as miRNA sponges in**  
19 **nature.**

20 Oscillations are intrinsic to the behaviour of biological systems, across scales, species, stages  
21 of development, and in health and disease *Glass (2001); Winfree (1967); Mirollo and Strogatz*  
22 *(1990)*. For example, during organismal development, oscillations are crucial to the generation  
23 of vertebrae, in a process termed somitogenesis *Wahl et al. (2007); Serth et al. (2003); Dale et al.*  
24 *(2006)*. During this stage of development, embryonic cells entrain synchronised oscillations, resulting  
25 in the development of vertebrae in a coordinated, clock-like process. In organisms exhibiting  
26 circadian rhythms, synchronised patterns of neurotransmitter and neurohormonal release are  
27 coupled to oscillatory modes *Welsh et al. (1995); Goldbeter (2002); Strogatz (2000)*. For both of  
28 these cases, a fundamental question is how a complex interacting system of biomolecules, with  
29 intrinsic stochasticity and uncertainty, is able to produce and sustain oscillatory behaviour. In  
30 somitogenesis, a seminal work in mathematical biology has proposed the ‘clock and wavefront’  
31 model, which predicts the occurrence of oscillations arising from a biochemical network and  
32 diffusive effects *Baker et al. (2006)*. For circadian oscillators, the discovery of the regulation of  
33 the Period protein and intercellular coupling has shown how oscillations can emerge *Mirollo*  
34 *and Strogatz (1990); Goldbeter (2002); Strogatz (2000)*. Thus, oscillatory behaviour arises in these  
35 systems from carefully balanced interactions at the RNA and protein level, among species with  
36 specific kinetic properties, giving rise to tunable, dynamic oscillations, even in a noisy biological  
37 environment.

38 The manner in which the various species of non-coding RNA (ncRNA) affect these oscillatory  
39 dynamics is to be determined, as predicted functions remain elusive for circular RNA (circRNA),  
40 long non-coding RNA (lncRNA), and pseudogenes *Li et al. (2013); Thomson and Dinger (2016);*  
41 *Paraskevopoulou et al. (2012); Jeggari et al. (2012)*. One common trait among each of these ncRNA  
42 is thought to be the competitive binding of miRNA, repressing these so that they are unable to

43 bind mRNA *Ebert and Sharp (2010)*. This competition for miRNA binding is termed ‘sponging’,  
 44 and is thought to be a primary function of certain circRNA, pseudogenes, expressed 3’ UTRs, and  
 45 potentially a function for lncRNA as well, as identified through sequence complementarity *Thomson*  
 46 *and Dinger (2016)*. In this work, we show how these ncRNA, acting as a generalised miRNA sponge  
 47 on an over-represented miRNA-mRNA-transcription factor feedback motif, can give rise to sustained,  
 48 tunable oscillations.

### 49 Defining a miRNA-transcription factor feedback motif

50 The topology of the underlying network of interactions between RNA and proteins has a direct link  
 51 to the system dynamics, and understanding this has led to wider predictions about the behaviour  
 52 of biomolecules in the transcriptome *Lee et al. (2002)*. For instance, extending these networks  
 53 to include species of non-coding RNA, such as miRNA, which act to inhibit their predicted mRNA  
 54 targets, has led to understanding of their functions in fine-tuning gene expression and maintaining  
 55 bistable states *Volinia et al. (2010)*; *Ryan et al. (2010)*; *Li et al. (2013)*; *Lai et al. (2016)*. These  
 56 transcriptome-wide studies have shown significant over-representation of specific miRNA-mRNA-  
 57 protein subnetworks, representing distinct classes of feedback and feedforward motifs, each  
 58 with unique intrinsic dynamical properties *Tsang et al. (2007)*. We consider an over-represented  
 59 feedback motif involving a miRNA and transcription factor, as identified by Tsang et al. *Tsang et al.*  
 60 *(2007)*. This motif is seen in an interaction between the E2F transcription factor and the miR-17/92  
 61 oncogenic cluster, and we will extend this by considering the effect of a miRNA sponge, depicted  
 62 graphically in Figure 1 *Aguda et al. (2008)*.

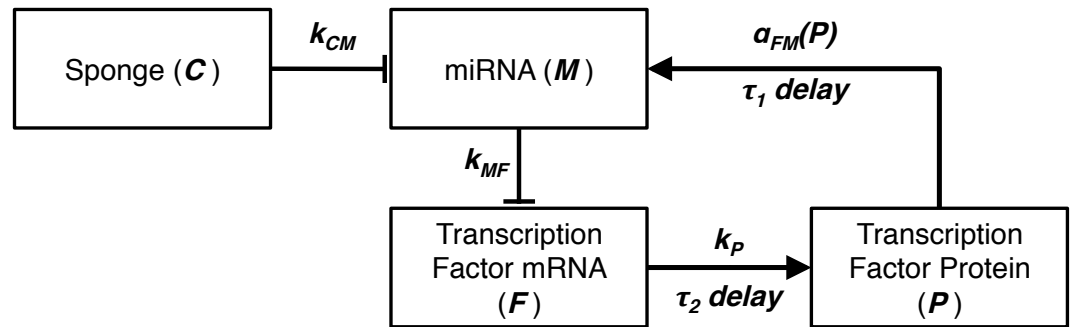

**Figure 1. The miRNA sponge network considered.** Directed arrows represent activation-type behaviour, and blunted arrows represent inhibitory behaviour. The system interconnections are overlaid with rate kinetic functions for each of the interactions and time delayed interactions are indicated by  $\tau_1$  and  $\tau_2$ , yielding System 2.

91 We summarise this system mathematically by the set of equations outlined in Box 1. With this  
 92 model, we analyse the long-term behaviour of this system via a stability analysis, and study the  
 93 properties of the unique equilibrium solution. As per the derivation in the Supplementary Methods,  
 94 we apply the Hopf bifurcation theorem to show that for cases where the time delays are non-zero,  
 95 there is a Hopf bifurcation when the sum of the time delays  $\tau_1$  and  $\tau_2$  exceeds some critical time  $\tau_0$ ;  
 96 resulting in a switch from asymptotic stability to an oscillatory steady state.

97 As a numerical illustration of this switch, consider the system for the following parameter values,  
 98 chosen because they fall within a realistic range for known range parameters for mammalian cells  
 99 as used in similar models (e.g. *Monk (2003)*; *Schwanhäusser et al. (2011)*):  $\alpha_C = 1$ ,  $\delta_C = 0.01$ ,  $\alpha_F = 1$ ,  
 100  $\delta_F = 0.1$ ,  $\alpha_M = 1$ ,  $\delta_M = 1$ ,  $k_P = 10$ ,  $\delta_P = 0.1$ ,  $k_{CM} = 10$ ,  $k_{MF} = 0.1$ ,  $\beta_{FM} = 200$ ,  $\gamma_{FM} = 100$ , and  $n = 8$ , with  
 101 both cases of  $\tau_1 = \tau_2 = 0.5$  and  $\tau_1 = \tau_2 = 0.8$  as depicted in Figure 2A and B, respectively. These  
 102 parameter values give a critical time  $\tau_0$  of 1.43 for which if  $\tau_1 + \tau_2 > \tau_0$ , there is an oscillatory solution,  
 103 and when  $\tau_1 + \tau_2 < \tau_0$  there is a steady state solution, as shown in Figure 2A and B.

## 64 **Box 1. Mathematical model**

65 Our mathematical model is defined as follows, with parameter values in Table S1. We take  
 66 the concentration of sponging RNA over time  $t$  as  $C(t)$ , transcription factor mRNA as  $F(t)$ ,  
 67 transcription factor protein as  $P(t)$ , and miRNA as  $M(t)$ . We denote basal rates of production  
 68 of sponge RNA, miRNA, and transcription factor mRNA as  $\alpha_i$  where  $i \in \{C, M, F\}$ , respectively.  
 69 We denote basal rates of degradation of sponge RNA, miRNA, transcription factor mRNA, and  
 70 transcription factor protein as  $\delta_i$  with  $i \in \{C, M, F, P\}$ , respectively.

71 Inhibitory actions between two species  $i$  and  $j$  are supposed to follow mass-action kinetics  
 72 (see **Horn and Jackson (1972)** for a reference), with rate constant  $k_{ij}$  for  $(i, j) \in \{(C, M), (M, F)\}$   
 73 in the case of miRNA sponge repressing miRNA and miRNA repressing transcription factor  
 74 mRNA, respectively.

75 We suppose that the rate of production of protein from mRNA for transcription follows a  
 76 delayed linear relationship to the amount of mRNA, with an average translation rate of  $k_p$   
 77 per unit of mRNA. We represent time delays by  $\tau_1$  and  $\tau_2$  in this system to account for the  
 78 transcription factor-mediated activation of transcription, and translation of mRNA into protein,  
 79 respectively.

The interaction term between the transcription factor and its back-activation of miRNA pro-  
 duction is defined by the following Hill function, as in similar models (e.g. **Ingalls et al. (2017)**),  
 such that:

$$80 \quad \alpha_{FM}(P) = \frac{\beta_{FM}}{\left(\frac{\gamma_{FM}}{P}\right)^n + 1}. \quad (1)$$

83 From a first-order mass-action kinetics formulation, we obtain the delay differential equations,  
 84 with all derivatives taken with respect to time  $t$  signified by  $\dot{C}$ ,  $\dot{M}$ ,  $\dot{F}$ ,  $\dot{P}$ , as such:

$$85 \quad \begin{aligned} 86 \quad \dot{C} &= \alpha_C - \delta_C C - k_{CM} C M \\ 87 \quad \dot{M} &= \alpha_M - \delta_M M - k_{CM} C M - k_{MF} M F + \alpha_{FM}(P(t - \tau_1)) \\ 88 \quad \dot{F} &= \alpha_F - \delta_F F - k_{MF} M F \\ 89 \quad \dot{P} &= k_p F(t - \tau_2) - \delta_P P. \end{aligned} \quad (2)$$

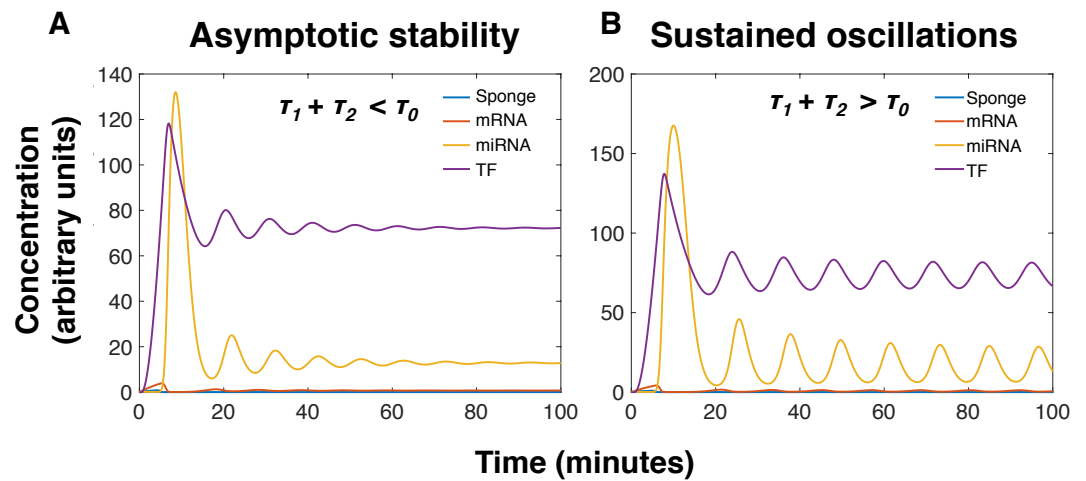

**Figure 2. Increasing system delay past critical threshold induces steady oscillatory behaviour, traversing a Hopf bifurcation.** Plots depict the effects of having  $\tau_1 + \tau_2$  below (A) and above (B) the critical time threshold  $\tau_0$  as derived above, based on the Hopf bifurcation theorem. Common parameter values used for this simulation are:  $\alpha_C = 1$ ,  $\delta_C = 0.01$ ,  $\alpha_F = 1$ ,  $\delta_F = 0.1$ ,  $\alpha_M = 1$ ,  $\delta_M = 1$ ,  $k_p = 10$ ,  $\delta_p = 0.1$ ,  $k_{CM} = 10$ ,  $k_{MF} = 0.1$ ,  $\beta_{FM} = 200$ ,  $\gamma_{FM} = 100$ , and  $n = 8$ , with  $\tau_1$  and  $\tau_2$  indicated as above.

### 104 A novel mechanism for generating sustained oscillations

105 Our analysis shows that there is a critical sum of the two time delays, which is a function of system  
 106 parameter values, above which oscillatory behaviour emerges. This parametric dependence of  
 107 the critical time may be exploited by biological systems to generate dynamic oscillatory behaviour,  
 108 as although the parameters governing the kinetics and delays present in a biological system are  
 109 largely fixed, rates of production and degradation vary significantly *Suter et al. (2011)*; *Cai et al.*  
 110 *(2008)*; *Schwanhäusser et al. (2011)*; *Chen et al. (1999)*. These may cause the system to move from  
 111 an oscillatory state to a non-oscillatory state, or vice versa.

112 Transcriptional bursting is a phenomenon that has been observed across species for a number  
 113 of genes, especially during developmental properties, whereby transcription is increased in a ‘burst’  
 114 over a relatively short period of time *Suter et al. (2011)*. Thus, as a descriptive example, we consider  
 115 a time-varying value for  $\alpha_C$ , increasing it ten-fold from the baseline parameter values as used in  
 116 Figure 2, as may occur during particular developmental processes (e.g. those in which circRNA  
 117 are hypothesised to function as miRNA sponges) *Qureshi and Mehler (2012)*. In this case, the new  
 118 system with a parameter value of  $\alpha_C = 10$  has a critical time of  $\tau_0 = 0.62$ , which implies that the  
 119 original system with  $\tau_1 = \tau_2 = 0.5$  is now oscillatory in steady state. To visualise this change, we  
 120 show the system behaviour as  $\alpha_C$  is increased ten-fold only transiently between simulation times  
 121 50 and 150 min, and is 1 otherwise, in Figure 3. Here, oscillations are created dynamically and in a  
 122 time-varying fashion, with their time to disappearance primarily determined by the miRNA sponge  
 123 degradation rate.

### 124 Stochastic considerations

125 In the case where the number of molecules is small, as may occur in single cells with low copy  
 126 numbers of these biomolecules, stochastic effects will predominate. In the stochastic setting,  
 127 our system is no longer described by the continuous variables written in System 2, but rather is  
 128 represented by a list of events that occur at discretised time steps, which we summarise in Box 2.

139 Moreover, because of the presence of non-zero time delays  $\tau_1$  and  $\tau_2$ , this system exhibits  
 140 non-Markovian behaviour, and therefore the stochastic behaviour may not follow the mean-field  
 141 approximation in the long-term. That is, there may be oscillatory behaviour in the stochastic case for  
 142 a parameter regime where the deterministic model does not predict oscillations. This phenomenon,

## Varying sponge production creates transient oscillatory dynamics, $\tau_1 + \tau_2 = 1$

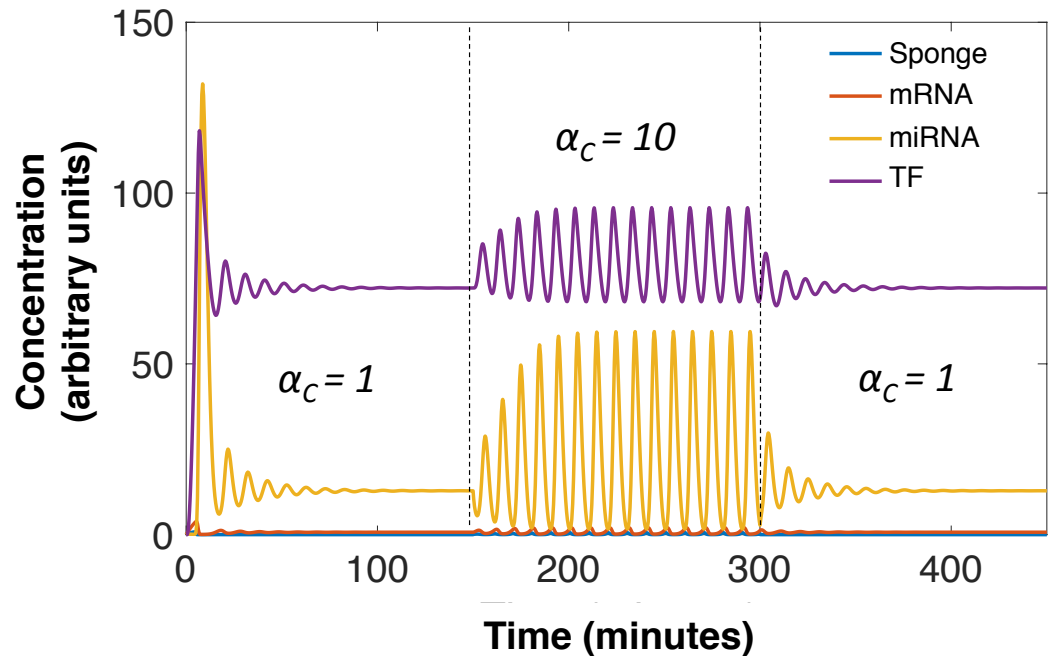

**Figure 3. A time-varying  $\alpha_C$  generates transient oscillatory behaviour.** Here, a time varying value of  $\alpha_C$  is used to illustrate the presence of a bifurcation.  $\alpha_C$  is increased to 10 from an initial value of 1 between simulation time 150 and 300, between which oscillatory behaviour is the absorbing state, and is reduced to 1 otherwise, at which asymptotic stability predominates. Other parameter values are such that:  $\delta_C = 0.01$ ,  $\alpha_F = 1$ ,  $\delta_F = 0.1$ ,  $\alpha_M = 1$ ,  $\delta_M = 1$ ,  $k_P = 10$ ,  $\delta_P = 0.1$ ,  $k_{CM} = 10$ ,  $k_{MF} = 0.1$ ,  $\beta_{FM} = 200$ ,  $\gamma_{FM} = 100$ , and  $n = 8$ , with  $\tau_1 = \tau_2 = 0.5$  as in Figure 2.

143 of *stochastic oscillations*, is one which we posit to be both significant and common among the  
 144 behaviour of RNA networks, and has been thought to contribute to other oscillatory systems, such  
 145 as the generation of circadian rhythms *olde Schepers et al. (1999)*; *Bratsun et al. (2005)*.

146 To capture the potential for stochastic oscillations in our system, we simulate our system  
 147 numerically, noting that conventional analytic approaches to this problem are intractable as they  
 148 require deriving and solving the Langevin equations derived from the reactions in System 3. The  
 149 algorithm we implement, described in the Supplementary Materials (Algorithm 1) is based on the  
 150 standard Gillespie algorithm, modified to handle the case of time-delayed reactions, also used for  
 151 similar purposes such as delayed mRNA gene networks and chemical reaction networks *Gillespie*  
 152 *(1977)*; *Bratsun et al. (2005)*; *Anderson (2007)*. Briefly, in this algorithm, if a time-delayed reaction is  
 153 chosen to occur based on the current state of the system, it is not executed until a future time, at  
 154 which it is *scheduled* to occur, by a queuing system.

155 Figure 4 (left) depicts the results of a stochastic simulation for our system, showing oscillatory  
 156 behaviour, with the overlaid mean field behaviour of  $N = 100$  runs of the stochastic model. To  
 157 study the periodicity of the stochastic signal, we take the Fourier transform of the time dynamics,  
 158 and analyse the power spectra for underlying modes. Shown in Figure 4 (right), this reveals a  
 159 strong subcomponent of an underlying oscillatory mode for the stochastic simulations, whereas  
 160 the deterministic behaviour for this system with the same parameter values does not show this  
 161 oscillatory mode.

130

## Box 2. Stochastic model

131

132

133

134

135

136

137

138

The reaction ‘events’ and the associated rates at which they occur in the stochastic version of our system are as described in System 2, with kinetic rate parameters on the right hand side, and a time delay indicated if present for that reaction. Each of the dynamic variables and parameters is as described above and in Table S1. The symbol  $\emptyset$  on the left side of a reaction indicates *de novo* synthesis, and on the right side of a reaction this indicates degradation.

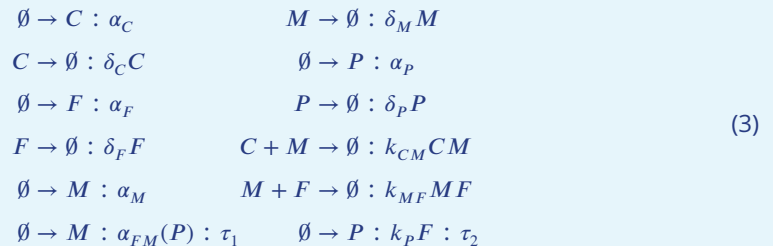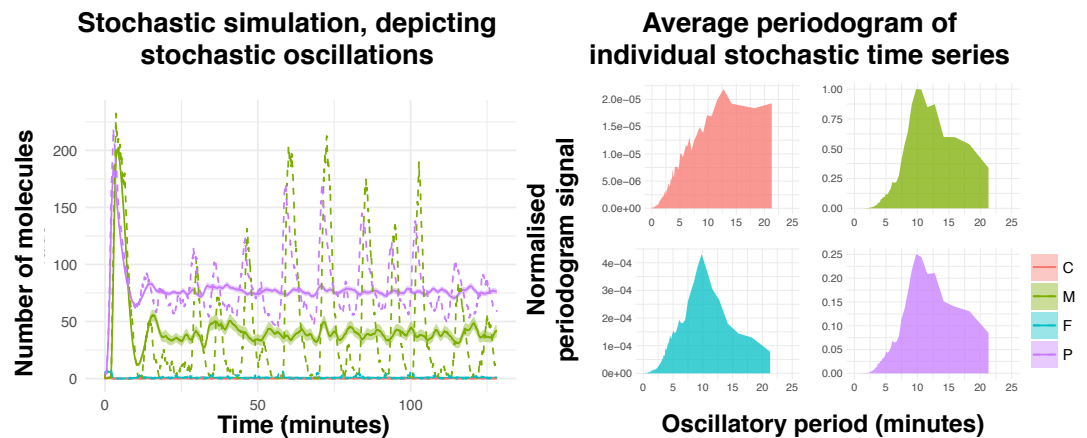

**Figure 4. Stochastic system dynamics, showing an individual trace of mean behaviour and stochastic oscillations (left) and periodogram (right).** Left: Averaged stochastic system dynamics do not show oscillations, but individual trajectories do. Dotted lines indicate an individual trajectory for a simulation, and bold lines are taken over an average of 100 runs, with standard error shaded around these lines. Right: Using the dynamics from stochastic simulations, we show the presence of underlying oscillatory modes, when the mean field behaviour predicts asymptotic stability. Plots are of the average of 100 periodogram signal intensities, computed for each of the simulations of the stochastic model. Strong signal for an underlying oscillatory mode with period 10-15 minutes for the stochastic oscillations is evident, as corroborated by the individual series trace in Figure 4 (right). Parameter values used are the same as that of Figure 2, such that  $\alpha_C = 1$ ,  $\delta_C = 0.01$ ,  $\alpha_F = 1$ ,  $\delta_F = 0.1$ ,  $\alpha_M = 1$ ,  $\delta_M = 1$ ,  $k_P = 10$ ,  $\delta_P = 0.1$ ,  $k_{CM} = 10$ ,  $k_{MF} = 0.1$ ,  $\beta_{FM} = 200$ ,  $\gamma_{FM} = 100$ , and  $n = 8$ , with  $\tau_1 = \tau_2 = 0.5$ , initial values chosen as 5 arbitrarily for all species.

162

## Discussion

163

164

165

166

167

168

169

Here, we have considered a common miRNA-transcription factor network motif extended to include a miRNA sponge. We have shown how, without changing time delays or fixed kinetic parameters, oscillations can arise with simple changes in production and degradation rates of the miRNA sponge. In the stochastic case, we have shown how these oscillatory dynamics are more prevalent, and are not seen in some cases, for an equivalent set of parameters in the deterministic limit. These results have implications that show how different types of non-coding RNA acting as miRNA sponges may generate dynamics not otherwise possible in a biological system.

## 170 Different types of miRNA sponges confer different system behaviours

171 A key conclusion of this work is that different fixed kinetic properties of miRNA sponges will lead to  
 172 different regimes and potentials for oscillatory dynamics in this network motif. As such, mapping  
 173 these kinetic parameters to known information for the different species of RNA acting as miRNA  
 174 sponges, we can hypothesise their effects, as depicted in Figure 5. For example, circRNA are  
 175 differentiated from other species of ncRNA by their stability, as they do not have free ends, and  
 176 so are not subject to the same RNA-se degrading enzymes *Enuka et al. (2016)*; *Gruner et al. (2016)*.  
 177 Based on our analysis, circRNA in this network motif acting as a miRNA sponge will push the  
 178 steady state closer to oscillatory behaviour, potentially crucial to the maintenance of this state.  
 179 In the same vein, recent work involving circRNA characterisation has shown, through knockdown  
 180 experiments, that specific circRNA are heavily involved in neurogenesis, a process where such  
 181 oscillatory behaviour is likely crucial *Piwecka et al. (2017)*; *Hanan et al. (2017)*.

182 On the other hand, these results suggest that miRNA sponged by lncRNAs with a short half-life  
 183 (as identified through a recent genome-wide analysis of lncRNA half-lives by Clark et al.), are likely  
 184 to exhibit greater stability and less propensity towards oscillatory behaviour *Clark et al. (2012)*. In  
 185 effect, these lncRNA, if produced in targeted bursts, may provide tight *temporal control* of oscillatory  
 186 behaviour, perhaps crucial to regulating a switch between oscillatory and non-oscillatory behaviour,  
 187 as in somitogenesis.

|                                                 | Pseudogenes                                                                       | ceRNA                                                                             | 3' UTRs                                                                           | circRNA                                                                             | lncRNA                                                                              |
|-------------------------------------------------|-----------------------------------------------------------------------------------|-----------------------------------------------------------------------------------|-----------------------------------------------------------------------------------|-------------------------------------------------------------------------------------|-------------------------------------------------------------------------------------|
|                                                 |  |  |  |  |  |
| <b>Degradation Rate (<math>\delta_c</math>)</b> |                                                                                   | Variable                                                                          |                                                                                   | ↓↓                                                                                  | ↑/Variable                                                                          |
| <b>Production Rate (<math>\alpha_c</math>)</b>  |                                                                                   | Variable                                                                          |                                                                                   | ↑/Variable                                                                          | Variable                                                                            |
| <b>Binding Rate (<math>k_{CM}</math>)</b>       |                                                                                   | ↓/Variable                                                                        |                                                                                   | ↑/Variable                                                                          | Variable                                                                            |
| <b>Potential Behaviour</b>                      | Stable behaviour, time-varying oscillatory behaviour                              |                                                                                   |                                                                                   | Prolonged oscillatory behaviour, slow stabilisation                                 | Time varying oscillatory behaviour, quick stabilisation                             |

**Figure 5. Summary of potential behaviours for different ncRNA acting as miRNA sponges in reaction network.** Relationships between the dynamic parameters thought to occur for different ncRNA species functioning as miRNA sponges, and the effects of these parameter regimes has on system behaviour.

## 188 miRNA sponges in low copy number may be involved in the generation and main- 189 tenance of stochastic oscillations

190 As a result of the delay differential equation system we are considering, the system does not act in  
 191 a purely Markovian manner. In practical terms, this means that the stochastic system dynamics can  
 192 exhibit oscillatory behaviour, even in a parameter regime where the deterministic solution does not.  
 193 This result is particularly relevant for non-coding RNA, such as circRNA, which are thought to exist  
 194 with low molecular counts, suggesting that oscillatory behaviour may be a more common feature  
 195 of these RNA networks than would otherwise be predicted.



196 Further, we consider the implications of extending the presented model to account for spatial  
197 differences in molecule concentration. Because the production of these biomolecules is spatially  
198 organised within the cell, and they diffuse within the nucleus and cytoplasm, the system dynamics  
199 will differ between stochastic and deterministic among various sub-regions in the cell. Regions  
200 closer to the edges of a diffusive boundary will have lower numbers of molecules, and therefore a  
201 greater propensity for stochastic oscillations, in certain cases. This may lead to a scenario in which  
202 there are steady state dynamics of the network at central regions of higher concentration, followed  
203 by disordered stochastic oscillatory behaviour as the biomolecules diffuse outward. While this  
204 level of resolution has not yet been attained experimentally, such a spatial organisation may allow  
205 cells to generate oscillations at the behaviour of a cellular membrane; potentially facilitating motile  
206 behaviour, for example.

### 207 **Implications for ncRNA-based therapeutics**

208 The results presented within this work also have implications for ncRNA-based therapeutic strate-  
209 gies. Figure S1 in the Supplementary Materials shows the key determinants of steady state levels  
210 for each of the species, through a parameter sensitivity analysis. Focussing on the values obtained  
211 for the system sensitivity to miRNA sponge parameters, we are able to infer the impact of a ncRNA  
212 therapeutic acting as a miRNA sponge on the network dynamics. For example, this shows that  
213 in order to decrease miRNA concentration, as opposed to increasing the binding kinetics of the  
214 sponge to the miRNA, we predict that it would be more effective to increase the production rate of  
215 the sponge (or introduce a higher concentration of miRNA sponge exogenously).

### 216 **A novel experimental paradigm**

217 This work provides fertile ground for generating hypotheses regarding the functional roles of  
218 the various miRNA sponge species. However, we have done so within the confines of the limited  
219 evidence available at the present time. Characterisation of key kinetic parameters for miRNA sponge  
220 species, through the generation of synthetic forms, could provide ample substrate for more clearly  
221 elucidating their possible dynamics. Moreover, because we predict that these miRNA sponges  
222 may lead to oscillatory behaviour, the experimental design implemented must be robust enough  
223 to capture this. Instead of supposing *a priori* that there will be asymptotically stable dynamics,  
224 multiple time points with a sufficiently fine resolution must be considered to determine whether  
225 these oscillations are present. To optimise these time points for experimental assays, guidance  
226 should be sought from a theoretical model, with an analogous analysis as presented in this work.

227 Overall, we have shown a novel paradigm by which oscillatory behaviour can emerge in RNA  
228 networks, via the actions of miRNA sponges. From this theoretical exploration, we have provided  
229 insight into the functional redundancy of miRNA sponges in different RNA configurations in nature.  
230 This, together with emerging knowledge of the roles of ncRNA, suggests that these species  
231 potentially have key implications for the behaviour of RNA networks in states of health and disease.

### 232 **References**

- 233 **Aguda BD**, Kim Y, Piper-Hunter MG, Friedman A, Marsh CB. MicroRNA regulation of a cancer network: conse-  
234 quences of the feedback loops involving miR-17-92, E2F, and Myc. *Proceedings of the National Academy of*  
235 *Sciences*. 2008; 105(50):19678–19683.
- 236 **Anderson DF**. A modified next reaction method for simulating chemical systems with time dependent propen-  
237 sities and delays. *The Journal of Chemical Physics*. 2007; 127(21):214107.
- 238 **Baker RE**, Schnell S, Maini P. A clock and wavefront mechanism for somite formation. *Developmental Biology*.  
239 2006; 293(1):116–126.
- 240 **Bratsun D**, Volfson D, Tsimring LS, Hasty J. Delay-induced stochastic oscillations in gene regulation. *Proceedings*  
241 *of the National Academy of Sciences of the United States of America*. 2005; 102(41):14593–14598.
- 242 **Cai L**, Dalal CK, Elowitz MB. Frequency-modulated nuclear localization bursts coordinate gene regulation. *Nature*.  
243 2008; 455(7212):485.



- 244 **Chen T**, He HL, Church GM. Modeling gene expression with differential equations. In: *Biocomputing'99 World*  
245 *Scientific*; 1999.p. 29–40.
- 246 **Clark MB**, Johnston RL, Inostroza-Ponta M, Fox AH, Fortini E, Moscato P, Dinger ME, Mattick JS. Genome-wide  
247 analysis of long noncoding RNA stability. *Genome Research*. 2012; 22(5):885–898.
- 248 **Dale JK**, Malapert P, Chal J, Vilhais-Neto G, Maroto M, Johnson T, Jayasinghe S, Trainor P, Herrmann B, Pourquié  
249 O. Oscillations of the snail genes in the presomitic mesoderm coordinate segmental patterning and morpho-  
250 genesis in vertebrate somitogenesis. *Developmental Cell*. 2006; 10(3):355–366.
- 251 **Ebert MS**, Sharp PA. MicroRNA sponges: progress and possibilities. *RNA*. 2010; 16(11):2043–2050.
- 252 **Enuka Y**, Lauriola M, Feldman ME, Sas-Chen A, Ulitsky I, Yarden Y. Circular RNAs are long-lived and display only  
253 minimal early alterations in response to a growth factor. *Nucleic Acids Research*. 2016; 44(3):1370–1383.
- 254 **Gillespie DT**. Exact stochastic simulation of coupled chemical reactions. *The Journal of Physical Chemistry*.  
255 1977; 81(25):2340–2361.
- 256 **Glass L**. Synchronization and rhythmic processes in physiology. *Nature*. 2001; 410(6825):277–284.
- 257 **Goldbeter A**. Computational approaches to cellular rhythms. *Nature*. 2002; 420(6912):238–245.
- 258 **Gruner H**, Cortés-López M, Cooper DA, Bauer M, Miura P. CircRNA accumulation in the aging mouse brain.  
259 *Scientific Reports*. 2016; 6:38907.
- 260 **Hanan M**, Soreq H, Kadener S. CircRNAs in the brain. *RNA Biology*. 2017; 14(8):1028–1034.
- 261 **Horn F**, Jackson R. General mass action kinetics. *Archive for Rational Mechanics and Analysis*. 1972; 47(2):81–116.
- 262 **Ingalls B**, Mincheva M, Roussel MR. Parametric Sensitivity Analysis of Oscillatory Delay Systems with an  
263 Application to Gene Regulation. *Bulletin of Mathematical Biology*. 2017; p. 1–25.
- 264 **Jeggari A**, Marks DS, Larsson E. miRcode: a map of putative microRNA target sites in the long non-coding  
265 transcriptome. *Bioinformatics*. 2012; 28(15):2062–2063.
- 266 **Lai X**, Wolkenhauer O, Vera J. Understanding microRNA-mediated gene regulatory networks through mathemat-  
267 ical modelling. *Nucleic Acids Research*. 2016; 44(13):6019–6035.
- 268 **Lee TI**, Rinaldi NJ, Robert F, Odom DT, Bar-Joseph Z, Gerber GK, Hannett NM, Harbison CT, Thompson CM, Simon  
269 I, et al. Transcriptional regulatory networks in *Saccharomyces cerevisiae*. *Science*. 2002; 298(5594):799–804.
- 270 **Li JH**, Liu S, Zhou H, Qu LH, Yang JH. starBase v2.0: decoding miRNA-ceRNA, miRNA-ncRNA and protein-RNA  
271 interaction networks from large-scale CLIP-Seq data. *Nucleic Acids Research*. 2013; 42(D1):D92–D97.
- 272 **Mirollo RE**, Strogatz SH. Synchronization of pulse-coupled biological oscillators. *SIAM Journal on Applied*  
273 *Mathematics*. 1990; 50(6):1645–1662.
- 274 **Monk NA**. Oscillatory expression of Hes1, p53, and NF- $\kappa$ B driven by transcriptional time delays. *Current Biology*.  
275 2003; 13(16):1409–1413.
- 276 **Paraskevopoulou MD**, Georgakilas G, Kostoulas N, Reczko M, Maragkakis M, Dalamagas TM, Hatzigeorgiou AG.  
277 DIANA-LncBase: experimentally verified and computationally predicted microRNA targets on long non-coding  
278 RNAs. *Nucleic Acids Research*. 2012; 41(D1):D239–D245.
- 279 **Piwecka M**, Glažar P, Hernandez-Miranda LR, Memczak S, Wolf SA, Rybak-Wolf A, Filipchyk A, Klironomos F, Jara  
280 CAC, Fenske P, et al. Loss of a mammalian circular RNA locus causes miRNA deregulation and affects brain  
281 function. *Science*. 2017; 357(6357):eaam8526.
- 282 **Qureshi IA**, Mehler MF. Emerging roles of non-coding RNAs in brain evolution, development, plasticity and  
283 disease. *Nature Reviews Neuroscience*. 2012; 13(8):528.
- 284 **Ryan BM**, Robles AI, Harris CC. Genetic variation in microRNA networks: the implications for cancer research.  
285 *Nature Reviews Cancer*. 2010; 10(6):389–402.
- 286 **olde Scheper T**, Klinkenberg D, Pennartz C, Van Pelt J. A mathematical model for the intracellular circadian  
287 rhythm generator. *Journal of Neuroscience*. 1999; 19(1):40–47.

- 288 **Schwanhäusser B**, Busse D, Li N, Dittmar G, Schuchhardt J, Wolf J, Chen W, Selbach M. Global quantification of  
289 mammalian gene expression control. *Nature*. 2011; 473(7347):337.
- 290 **Serth K**, Schuster-Gossler K, Cordes R, Gossler A. Transcriptional oscillation of lunatic fringe is essential for  
291 somitogenesis. *Genes & Development*. 2003; 17(7):912–925.
- 292 **Strogatz SH**. From Kuramoto to Crawford: exploring the onset of synchronization in populations of coupled  
293 oscillators. *Physica D: Nonlinear Phenomena*. 2000; 143(1-4):1–20.
- 294 **Suter DM**, Molina N, Gatfield D, Schneider K, Schibler U, Naef F. Mammalian genes are transcribed with widely  
295 different bursting kinetics. *Science*. 2011; 332(6028):472–474.
- 296 **Thomson DW**, Dinger ME. Endogenous microRNA sponges: evidence and controversy. *Nature Reviews Genetics*.  
297 2016; 17(5):272–283.
- 298 **Tsang J**, Zhu J, van Oudenaarden A. MicroRNA-mediated feedback and feedforward loops are recurrent network  
299 motifs in mammals. *Molecular Cell*. 2007; 26(5):753–767.
- 300 **Volinia S**, Galasso M, Costinean S, Tagliavini L, Gamberoni G, Drusco A, Marchesini J, Mascellani N, Sana ME,  
301 Jarour RA, et al. Reprogramming of miRNA networks in cancer and leukemia. *Genome Research*. 2010;  
302 20(5):589–599.
- 303 **Wahl MB**, Deng C, Lewandoski M, Pourquié O. FGF signaling acts upstream of the NOTCH and WNT sig-  
304 naling pathways to control segmentation clock oscillations in mouse somitogenesis. *Development*. 2007;  
305 134(22):4033–4041.
- 306 **Welsh DK**, Logothetis DE, Meister M, Reppert SM. Individual neurons dissociated from rat suprachiasmatic  
307 nucleus express independently phased circadian firing rhythms. *Neuron*. 1995; 14(4):697–706.
- 308 **Winfree AT**. Biological rhythms and the behavior of populations of coupled oscillators. *Journal of Theoretical*  
309 *Biology*. 1967; 16(1):15–42.
